# Supplementary material for: Reconstitution of a functional human thymus by postnatal stromal progenitor cells and natural whole-organ scaffolds
Source: PubMed Central journal article supplement (PMC7732825; doi:10.1038/s41467-020-20082-7), 2020-12-11
Supplement: 41467_2020_20082_MOESM1_ESM.pdf [file 41467_2020_20082_MOESM1_ESM.pdf]

## Supplementary Information

### **Reconstitution of a functional human thymus by postnatal stromal progenitor cells and natural whole-organ scaffolds**

Campinoti, Gjinovci, Ragazzini et al.

- Supplementary Figures 1-10
- Supplementary Tables 1-3

# Supplementary Fig. 1

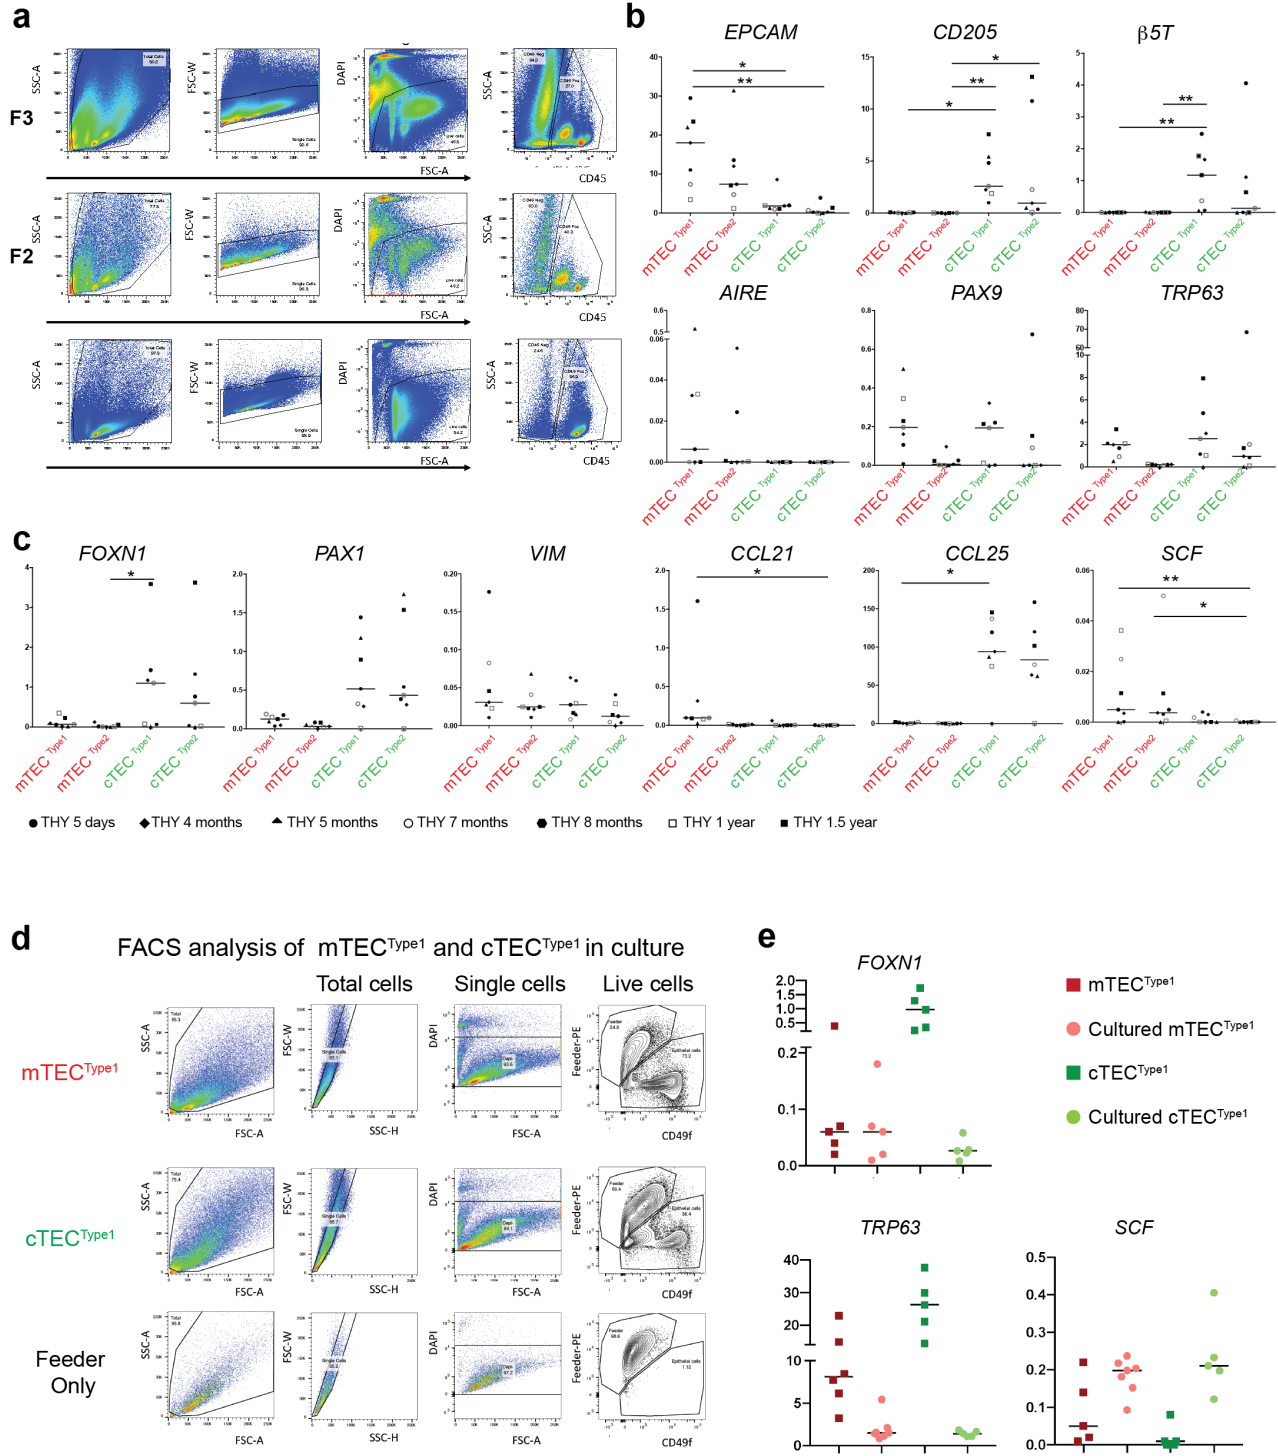

**Supplementary Fig. 1 | Phenotypic analysis of sorted thymic epithelial cells.** **a**, FACS plots representing analysis of the progressive enrichment fractions (F2-F3) of CD45<sup>+</sup> population before sorting TEC and TIC subpopulations; CD45<sup>+</sup> (PE<sup>-</sup>) population is about 2% after just several washing of the total dissociated postnatal thymus and increases up to 64% after 3 enrichment steps; n=18. **b-c**, RT-qPCR analysis of freshly sorted cTEC and mTEC (Type1 and Type2) from 7 thymi (donors age, 5 days-1.5 years old). *EPCAM* and *CD205* transcripts expression confirmed the purity of the sorting strategy, together with detection of cortical marker *b5T* only in cTEC and *AIRE* only in mTEC. *Vimentin* transcripts are detected in all freshly isolated cTEC and mTEC, while transcription factors (*PAX1*, *FOXP1*, *PAX9* and *TRP63*) and chemokines (*CCL21*, *CCL25*, *SCF*) were differentially expressed among the freshly isolated subpopulations (n=7 independent thymi; bars indicate the mean value). Relative gene expression to enriched CD45-negative cells is shown in Y axis; significance: two-way ANOVA, non-parametric; \*p<0.05; \*\*p<0.01. **d**, Representative FACS analysis of expanding (passage 5) mTEC Type1 and cTEC Type1 demonstrates CD49F-AF488 expression in TEC which are negative for anti-feeder-PE that label 3T3 feeder cells; n=4. **e**, RT-qPCR analysis showing gene expression levels for *FOXP1*, *TRP63* and *SCF* of freshly-isolated mTEC Type1 and cTEC Type1 versus cultured counterparts. mRNA relative abundance values normalised to *HPRT* are shown in Y axis. Donors age from 3 days to 1.5-year-old (n=5; mean ± SE).

## Supplementary Fig. 2

**a** Common gene expression for mTEC<sup>type1</sup> and cTEC<sup>type1</sup> in culture

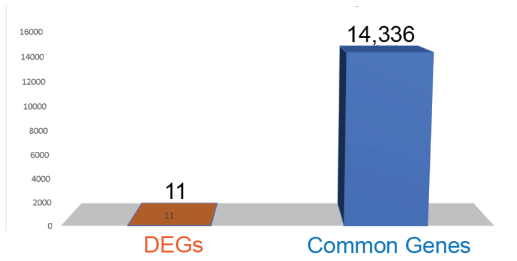

**b** DEGs in mTEC<sup>type1</sup> vs cTEC<sup>type1</sup> in culture

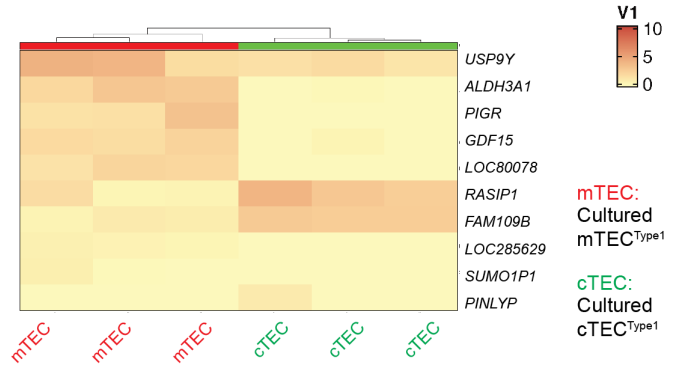

**c**

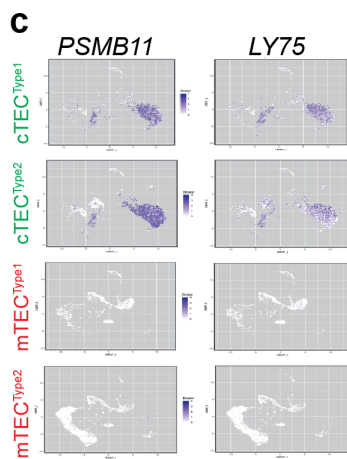

**d**

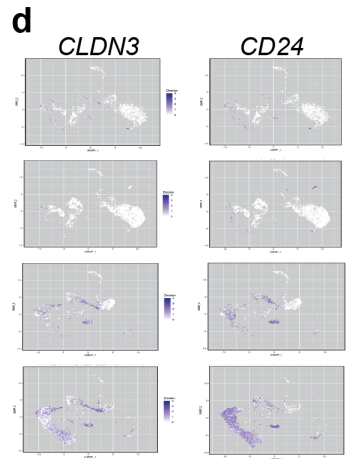

**e**

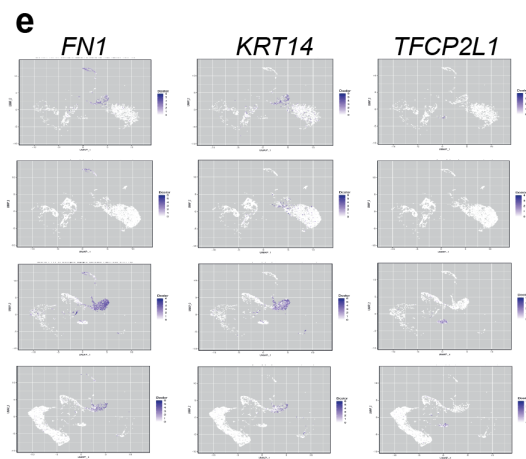

**f** EMT signature in freshly isolated TEC

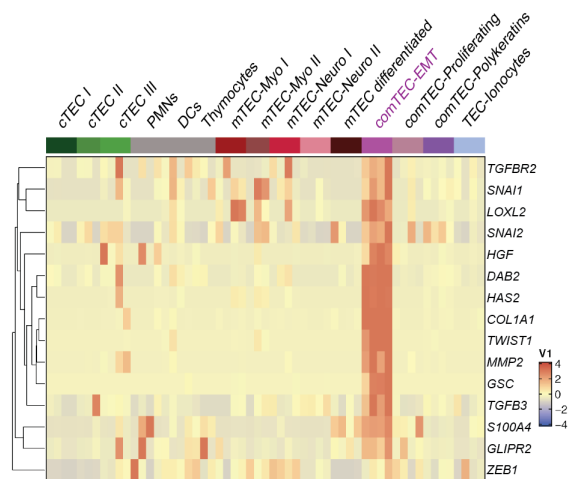

**g**

EMT signature in cultured TEC

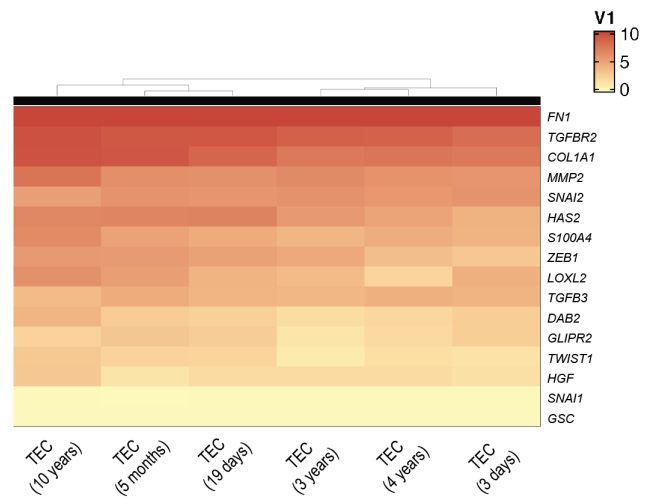

**Supplementary Fig. 2 | Transcriptional profiling of freshly-isolated and cultured thymic epithelial cells.** **a, b** Gene expression signature of cultivated cTEC and mTEC. Heatmap and hierarchical clustering of samples based on the most differentially expressed genes (DEGs): only 11 genes out of 14347 are differentially expressed between cultured mTEC and cTEC (=0.08%). Significant DEGs were selected applying a 0.05 cut-off on FDR and a threshold of 1.5 on logFC. Area under the curve (AUC) summary intensity plots of single genes expressed in cTEC: *PSMB11*, *LY75* (**c**); mTEC: *CD24*, *CLDN3* (**d**) and comTEC: *FN1*, *KRT14* and *TFCP2L1*(**e**); single-cell expression values are represented as calculated median intensity of area under the curve, purple scale. **f**, Heatmap showing EMT genes expression in freshly isolated single-cells from human postnatal thymic stroma (EMT cluster). TEC clusters are listed on the x axis, genes are listed on the y axis **g**, Heatmap of *in vitro* expanded TEC (passage IV) showing expression of mesenchymal genes. Entries display average log-normalized read counts per million for n=6 biological replicates of TEC cultures (donor age: 3 days to 10 years old).

### Supplementary Fig. 3

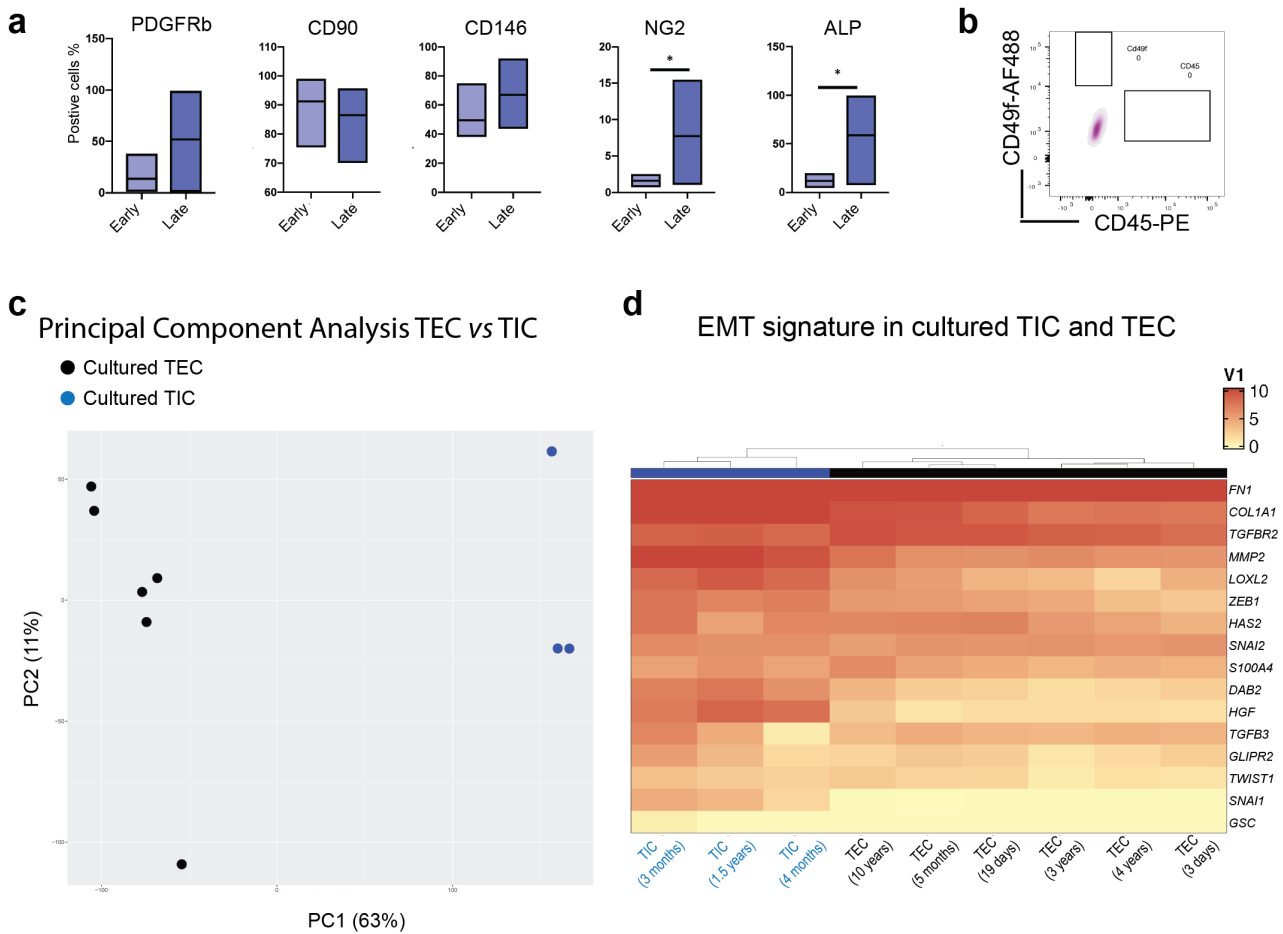

### Supplementary Fig. 3 | Cultivated thymic interstitial cells are distinct from thymic epithelium.

**a**, Floating bars (minimum to maximum value with line at the median) of FACS analysis showing percentage of PDGFR $\beta$  (PE), CD90 (AF700), CD146 (BV711), NG2 (AF488) and ALP (APC) positive TIC at early (II-III) and late (IV-VII) passages by FACS analysis (n=4; median  $\pm$  SE; significance: two-way ANOVA, non-parametric; \*p=0.035 for NG2 and p=0.014 for AP). **b**, Representative FACS analysis of expanding TIC demonstrates absence of both epithelial (CD49F<sup>+</sup>) and CD45<sup>+</sup> cells at early (II) passage (N=3). **c**, PCA plot of cultivated TEC vs TIC in culture showing sample variance according to PC1. (63%) and PC2 (11%) **d**, Heatmap of *in vitro* expanded TEC vs TIC showing expression of genes related to Epithelial Mesenchymal Transition (EMT). Entries display average log-normalized read counts per million for n=3 TIC and n=6 TEC biological replicates (donor age: 3 days to 10 years old).

Supplementary Fig. 4

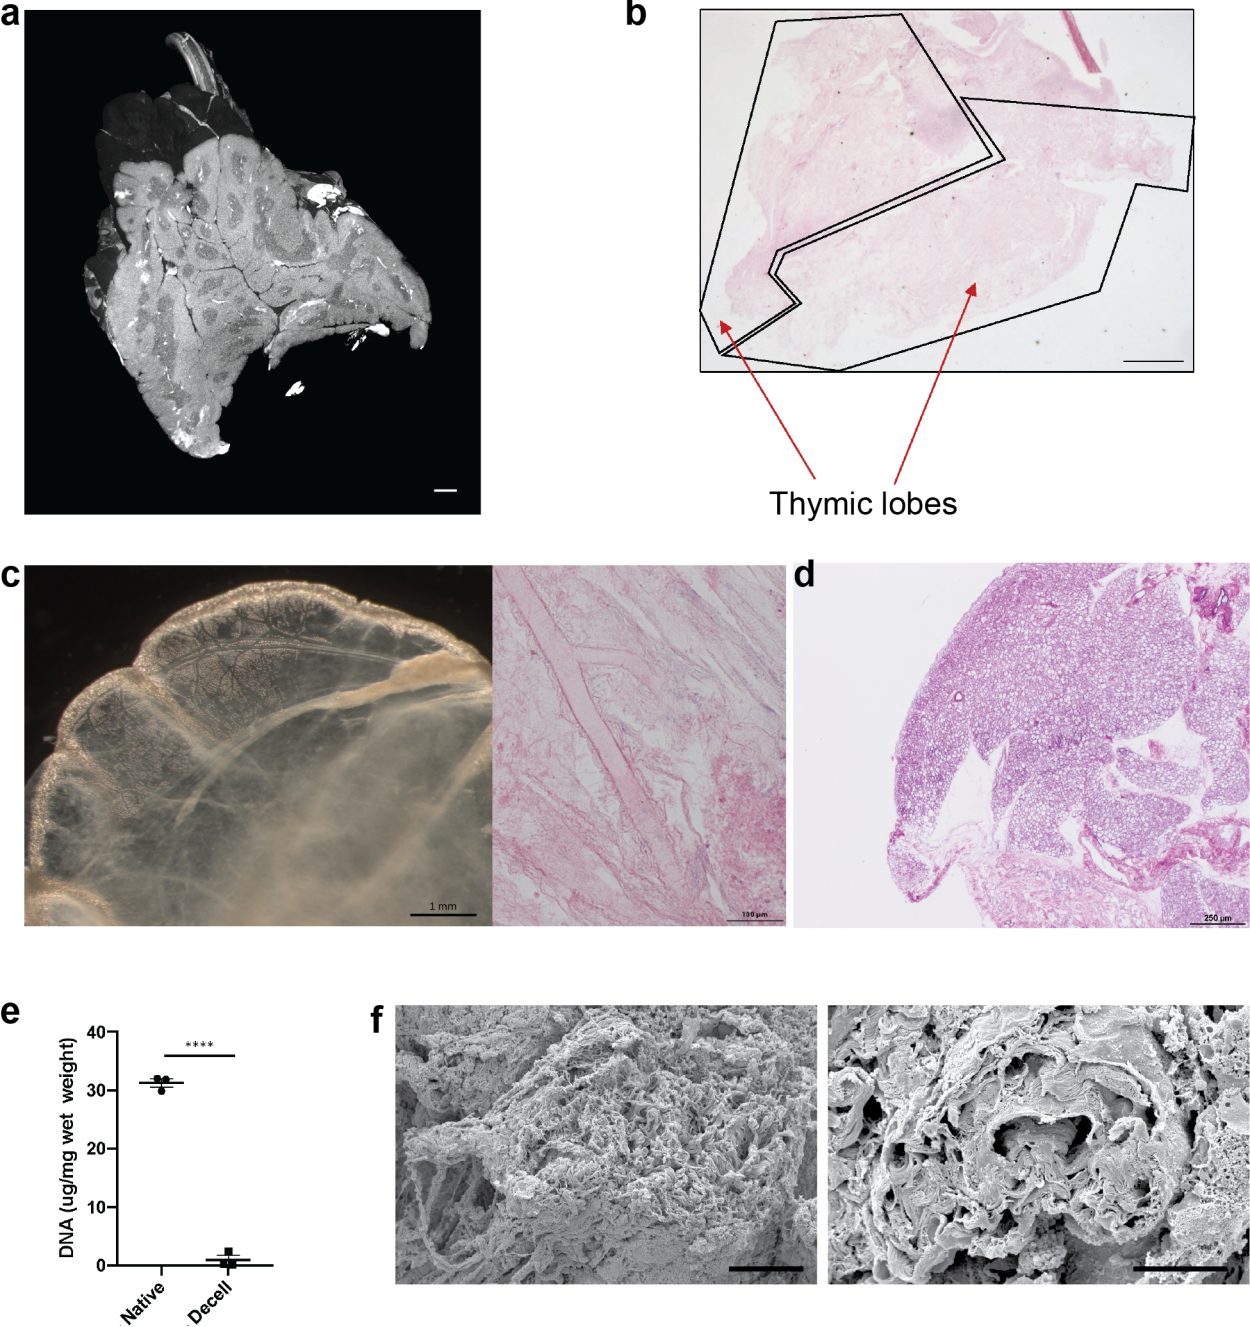

**Supplementary Fig. 4 | Advanced imaging of whole organ rat thymus scaffolds. a,** Segmentation of a micro-CT image of cannulated whole thymus organ shows organisation of cortex and medulla areas within both lobes, does providing a virtual histology of a whole organ. Scale bar, 1.2 mm. **b,** Haematoxylin&Eosin (H&E) of a rat thymus scaffold demonstrates homogenous decellularisation of the entire two thymic lobes; n=3 scaffolds. Scale bar, 500  $\mu\text{m}$ . **c,** Gross microscopy (left panel) and H&E of a decellularised thymus scaffold showing preservation of vasculature wall; n=3 scaffolds. Scale bar, 1 mm (left panel); 100  $\mu\text{m}$  (right panel). **d,** Van Gilsen's stain of a paraffin section of a decellularised rat thymus scaffold showing preservation of elastin fibres; n=3 scaffolds. Scale bar, 250  $\mu\text{m}$ . **e,** DNA quantification of fresh thymus tissue (Native) and decellularised thymus scaffold (Decell) demonstrates removal of DNA in the acellular scaffold (n=3 scaffolds, data presented as mean value  $\pm$  SD); significance: unpaired t-test two-tailed, \*\*\*\*p<0.0001. **f,** Scanning Electron Microscopy (SEM) of decellularised scaffold shows extra-cellular matrix (ECM) fibre organisation at high resolution. Scale bar, 50  $\mu\text{m}$  (left panel); 10  $\mu\text{m}$  (right panel); n=2 scaffolds.



Supplementary Fig. 5

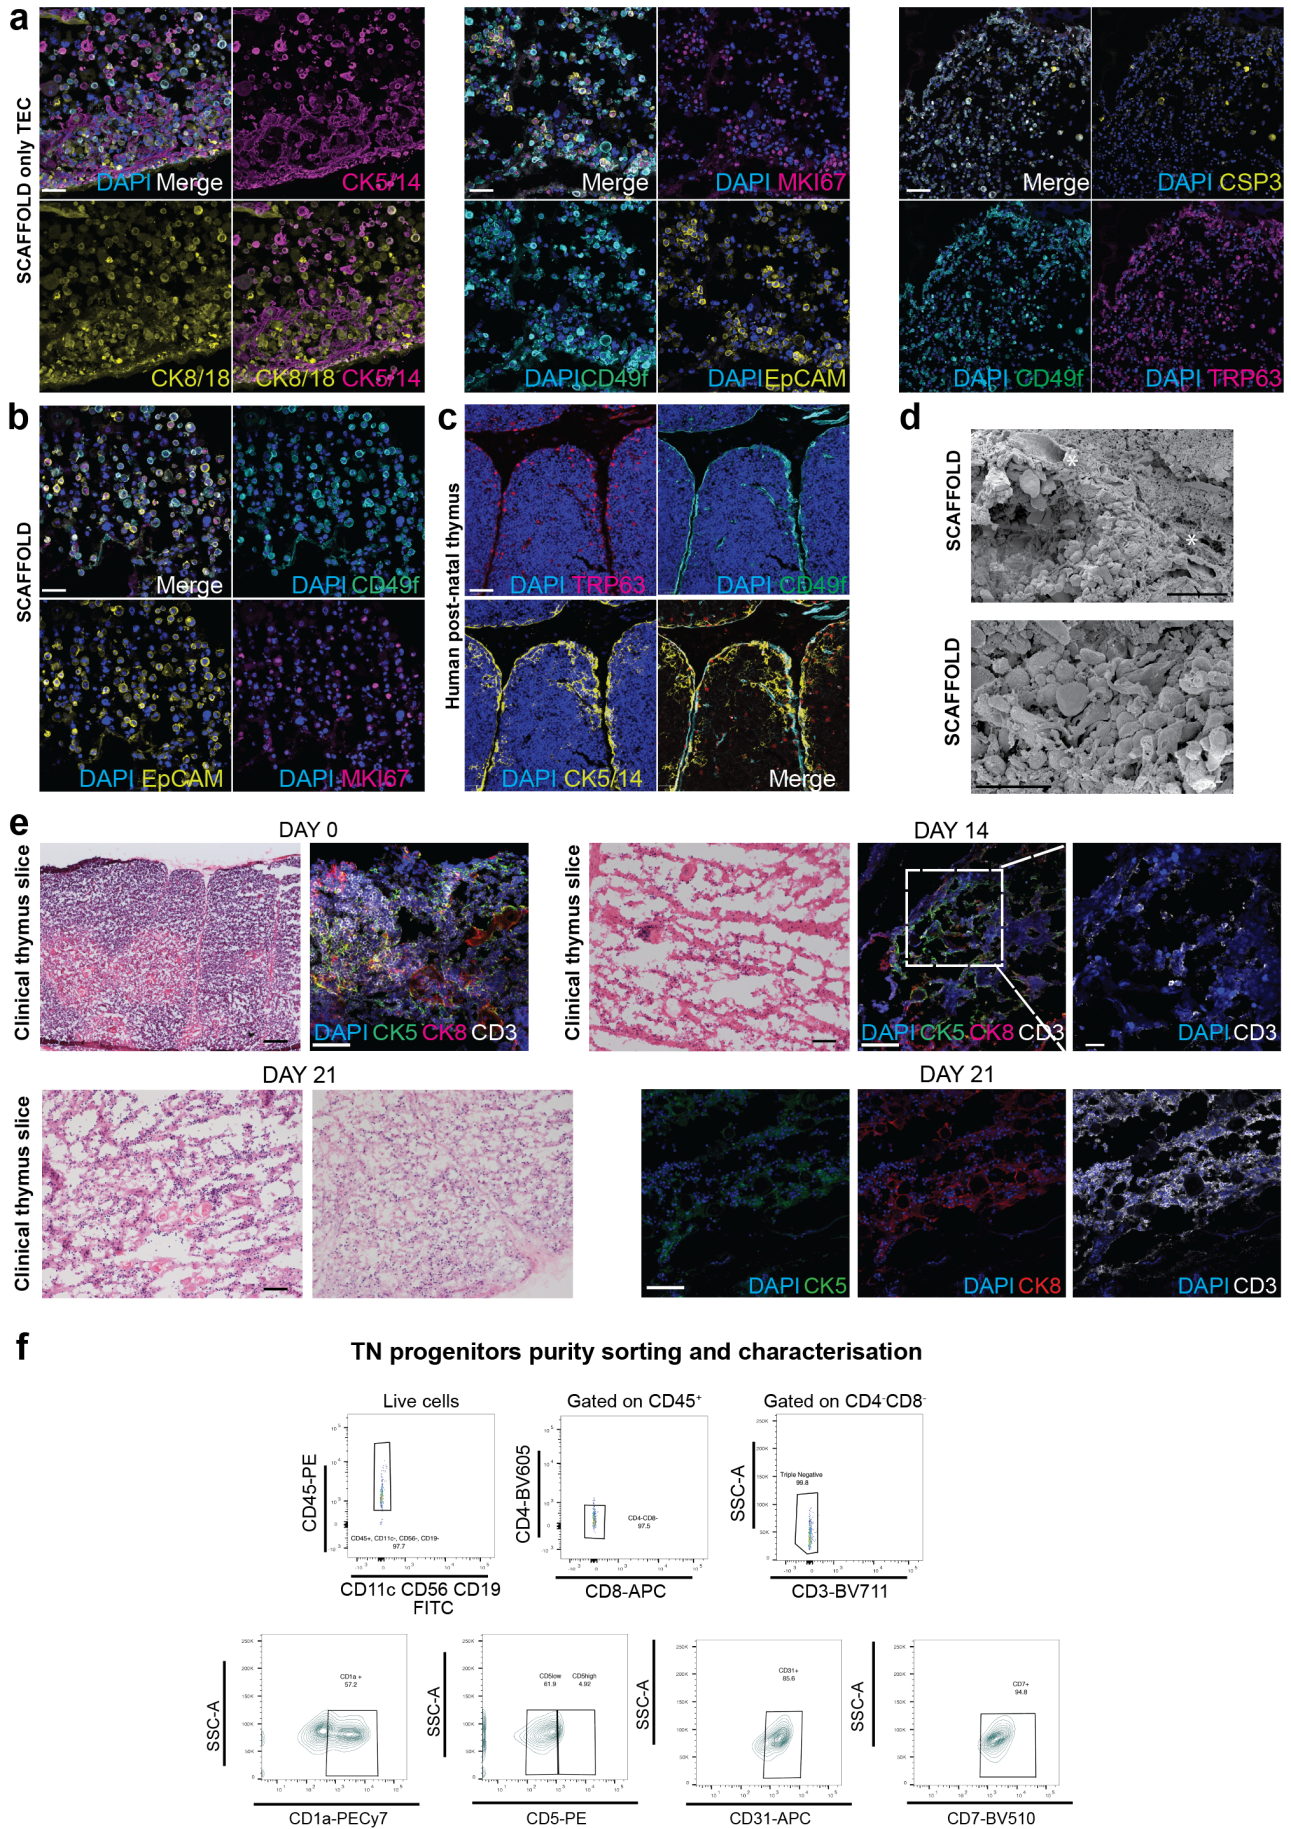

**Supplementary Fig. 5 | Functional repopulation of whole organ thymus scaffolds and comparison with clinical thymus slices.** **a**, Immunofluorescence labelling of thymic epithelial cells (TEC) seeded and grown within a decellularised scaffold demonstrating viable (Caspase3-negative), proliferative (Ki67<sup>+</sup>), CK5<sup>+</sup>CK8<sup>+</sup> double and single positive TEC; n=4 repopulated scaffolds. Scale bar, 50 μm. **b**, Immunohistochemistry of decellularised thymus scaffold repopulated with both TEC and TIC demonstrating presence of proliferative (Ki67<sup>+</sup>) EpCAM<sup>+</sup> and CD49f<sup>+</sup> cells upon culture; n=4 repopulated scaffolds. Scale bar, 50 μm. **c**, Immunofluorescence of a postnatal human thymus showing expression of TPR63 mainly in subcapsular regions where TEC are CK5/14<sup>+</sup> and CD49f<sup>high</sup>; n=5 thymi. Scale bar, 50 μm. **d**, Scanning Electron Microscopy (SEM) images of a scaffold repopulated with TEC and TIC and cultured for 5 days and re-organised around an intact vascular structure (indicated with asterisks, \*); n=2 repopulated scaffolds. Scale bar, 100 μm. **e**, Haematoxylin&Eosin (H&E) staining of a freshly prepared (DAY 0) clinical thymus slice and immunofluorescence against CK5 (green), CK8 (red) and CD3 (white) - upper left panels; histology and immunohistochemistry of clinical thymus slices cultivated for 14 and 21 days as prepared for transplantation into athymic patients: cyto-architecture is disrupted and CD3<sup>+</sup> (white) cells are still detectable; nuclei counterstained with DAPI (blue); n=3 sliced thymi. Scale bar, 50 μm. **f**, Upper panels: FACS purity check of sorted Triple Negative lymphoid progenitors (TN, CD3<sup>-</sup>CD4<sup>-</sup>CD8<sup>-</sup>), n=15; lower panels: representative FACS analysis for the expression of CD1a (PE-Cy7), CD5 (PE), CD7 (BV510) and CD31 (APC) of sorted TN cells, n=3.

## Supplementary Fig. 6

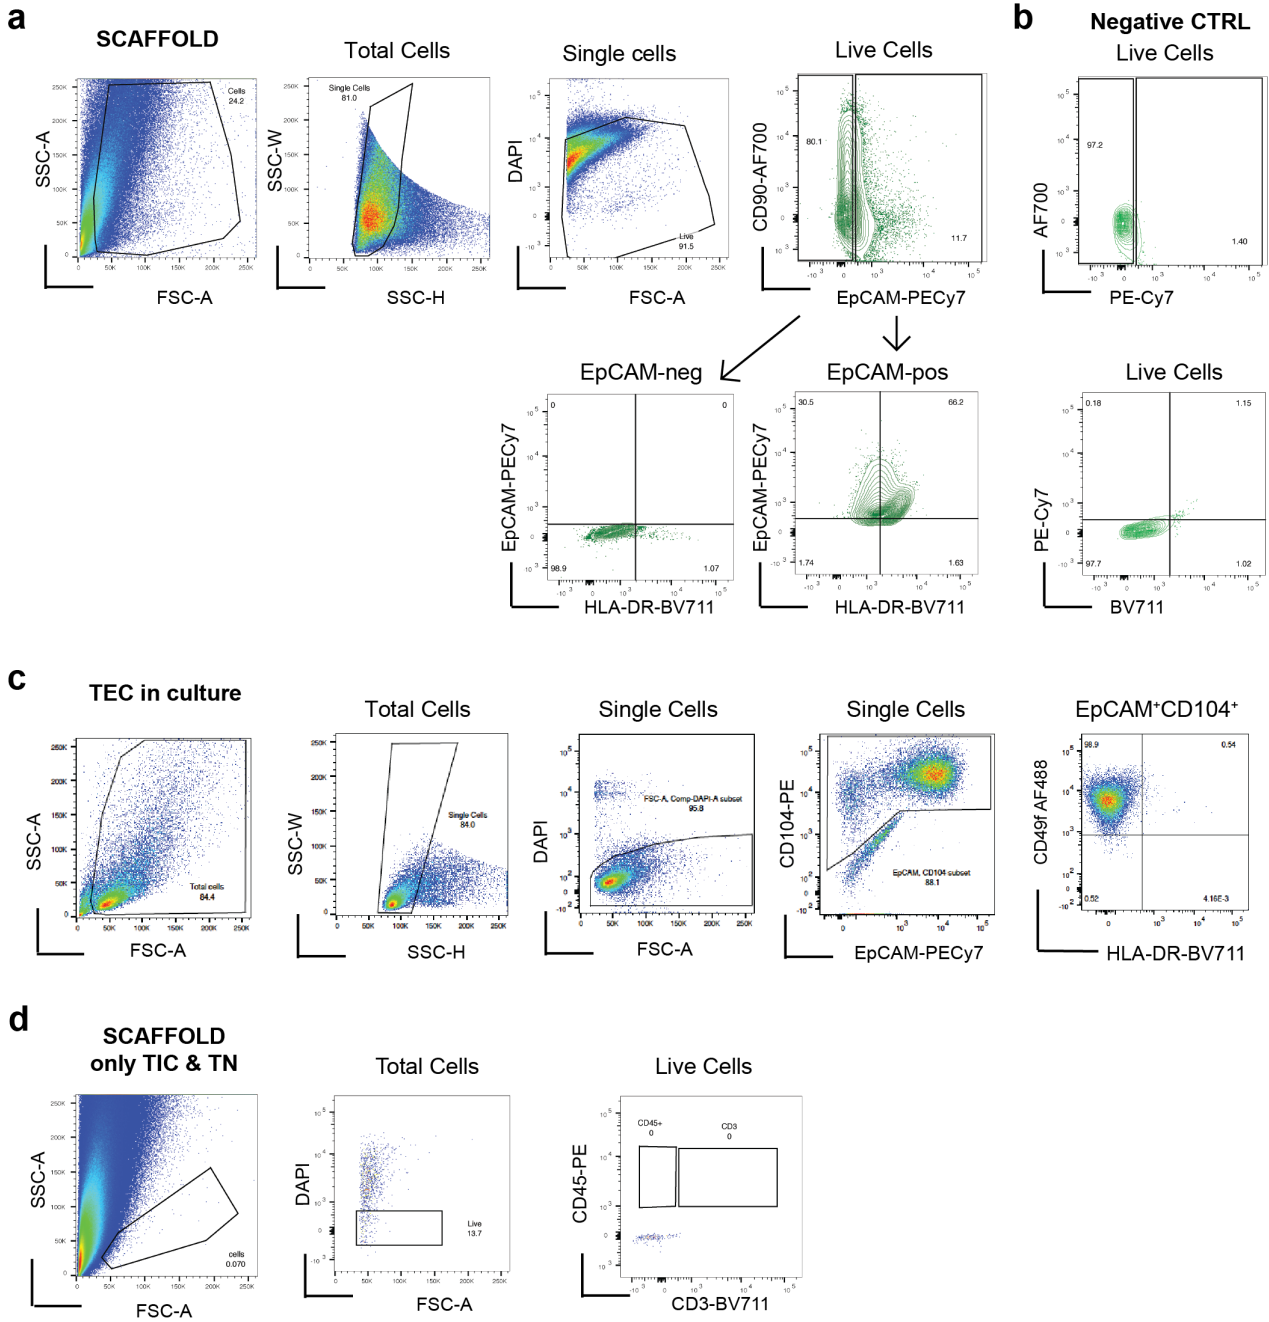

**Supplementary Fig. 6 | Thymus scaffolds *in vitro*, negative control and stromal compartment analysis.** **a**, FACS plots showing gating strategy and analysis of epithelial cells co-cultured with TIC and TN *in vitro* for 8 days. HLA-DR is expressed by EpCAM<sup>+</sup> cells but not by EpCAM<sup>-</sup> cells (Live cells: 70000 events; n=3 repopulated scaffolds). **b**, Unstained control for analysis in panel a. **c**, FACS plots representing the gating strategy and analysis of cultivated TEC (passage 4) positive for CD104 (Integrin  $\beta$ 4), EpCAM, CD49f but negative for HLA-DR; n=5 independent cultures. **d**, FACS analysis of *in vitro* scaffold co-cultured with TIC and TN shows no CD45<sup>+</sup> live cells within the scaffold after 8 days of culture (Live cells: 161 events; n=2).

**Supplementary Fig. 7**

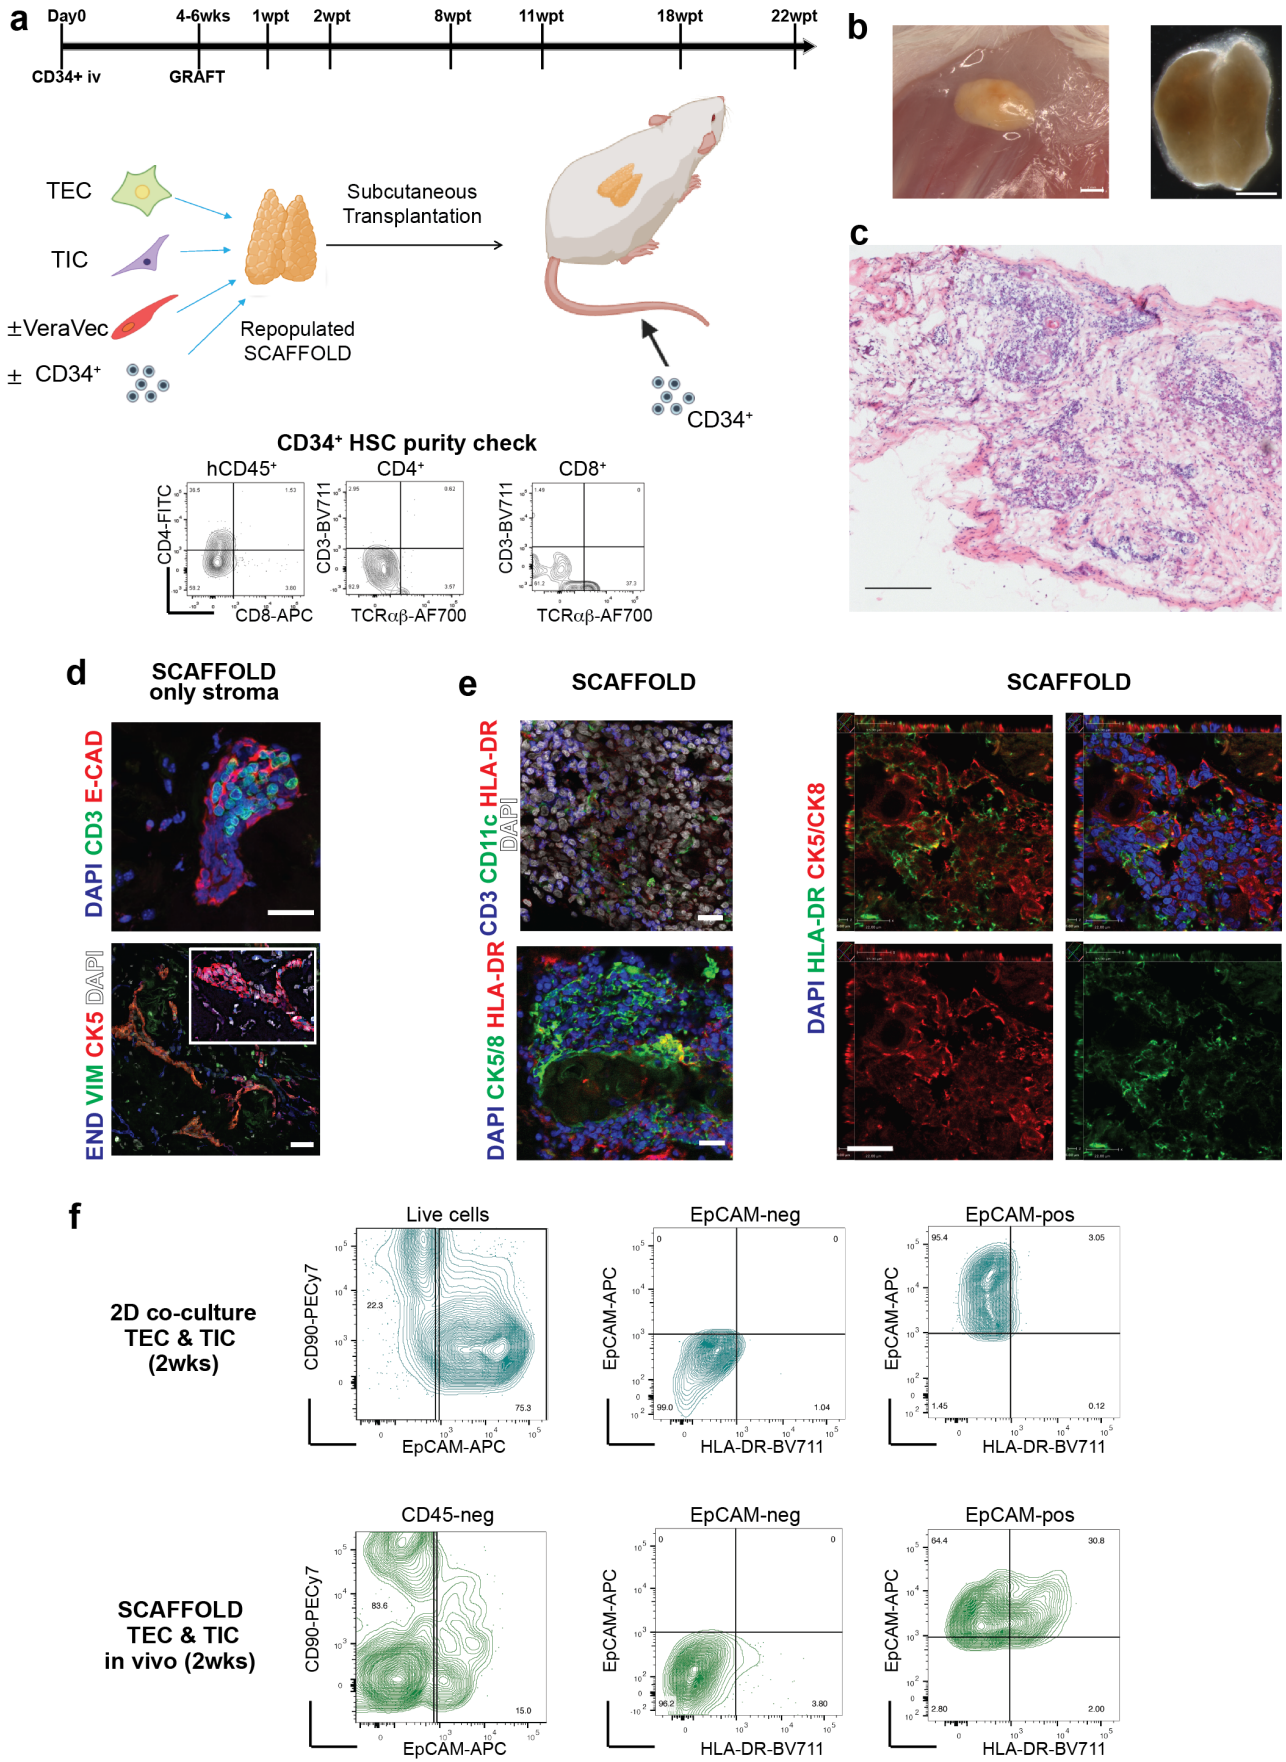

**Supplementary Fig. 7 | Whole organ thymus scaffolds mature *in vivo*.** **a**, Schematic summarising the *in vivo* transplantation assay. Humanisation of immunodeficient mice occurred 4 to 6 weeks prior subcutaneous grafting of repopulated scaffolds which were then harvested at different time points: 1, 2, 8, 11, 18 and 22 weeks post-transplant (wpt). The schematic was created with BioRender.com. Bottom panels: FACS plots showing purity check of CD34<sup>+</sup> HSC used for scaffold repopulation and mouse humanisation, n=6. **b**, Gross microscopy appearance of a representative reconstituted Scaffold 11 wpt before (left) and after (right) harvesting. Harvested scaffold has been cut in two parts: one half was processed for FACS analysis or sorting, the other half was processed for histology. Scale bar, 1 mm. **c**, Representative H&E of a repopulated scaffold at 11wpt showing many areas of thymic reorganisation with both stroma and thymocytes within remodelled ECM. n=4 scaffolds in two independent experiments. Scale bar, 250  $\mu$ m. **d**, Immunohistochemistry of thymus scaffold repopulated with only stroma demonstrates compact epithelial (CK5<sup>+</sup>, red) areas and initial migration and differentiation of HSCs towards CD3<sup>+</sup> cells (green) at 11 wpt; n=4 scaffolds. Scale bar, 40  $\mu$ m. **e**, Immunofluorescence (18wpt) demonstrating presence of HLA-DR-positive epithelial (EpCAM<sup>+</sup>) and dendritic (CD11c<sup>+</sup>) cells interacting with CD3<sup>+</sup> cells. Scale bar, 20  $\mu$ m. Nuclei counterstained with DAPI (left top panel: white; left bottom panel: blue). Right panel: High magnification of a single focal plane showing co-expression of HLA-DR in green with CK5-8 in Red; n=4 scaffolds in two independent experiments. Scale bar, 25  $\mu$ m. **f**, FACS analysis of 2D co-cultured TEC and TIC (upper panels, live cells= 12000 events) and fully 3D repopulated scaffold (TEC, TIC, VeraVEC and CD34<sup>+</sup>) harvested at 2wpt (bottom panels: live cells, CD45<sup>-</sup>=2100); n=2 independent experiments. HLA-DR profile is shown on EpCAM negative and positive populations.

## Supplementary Fig. 8

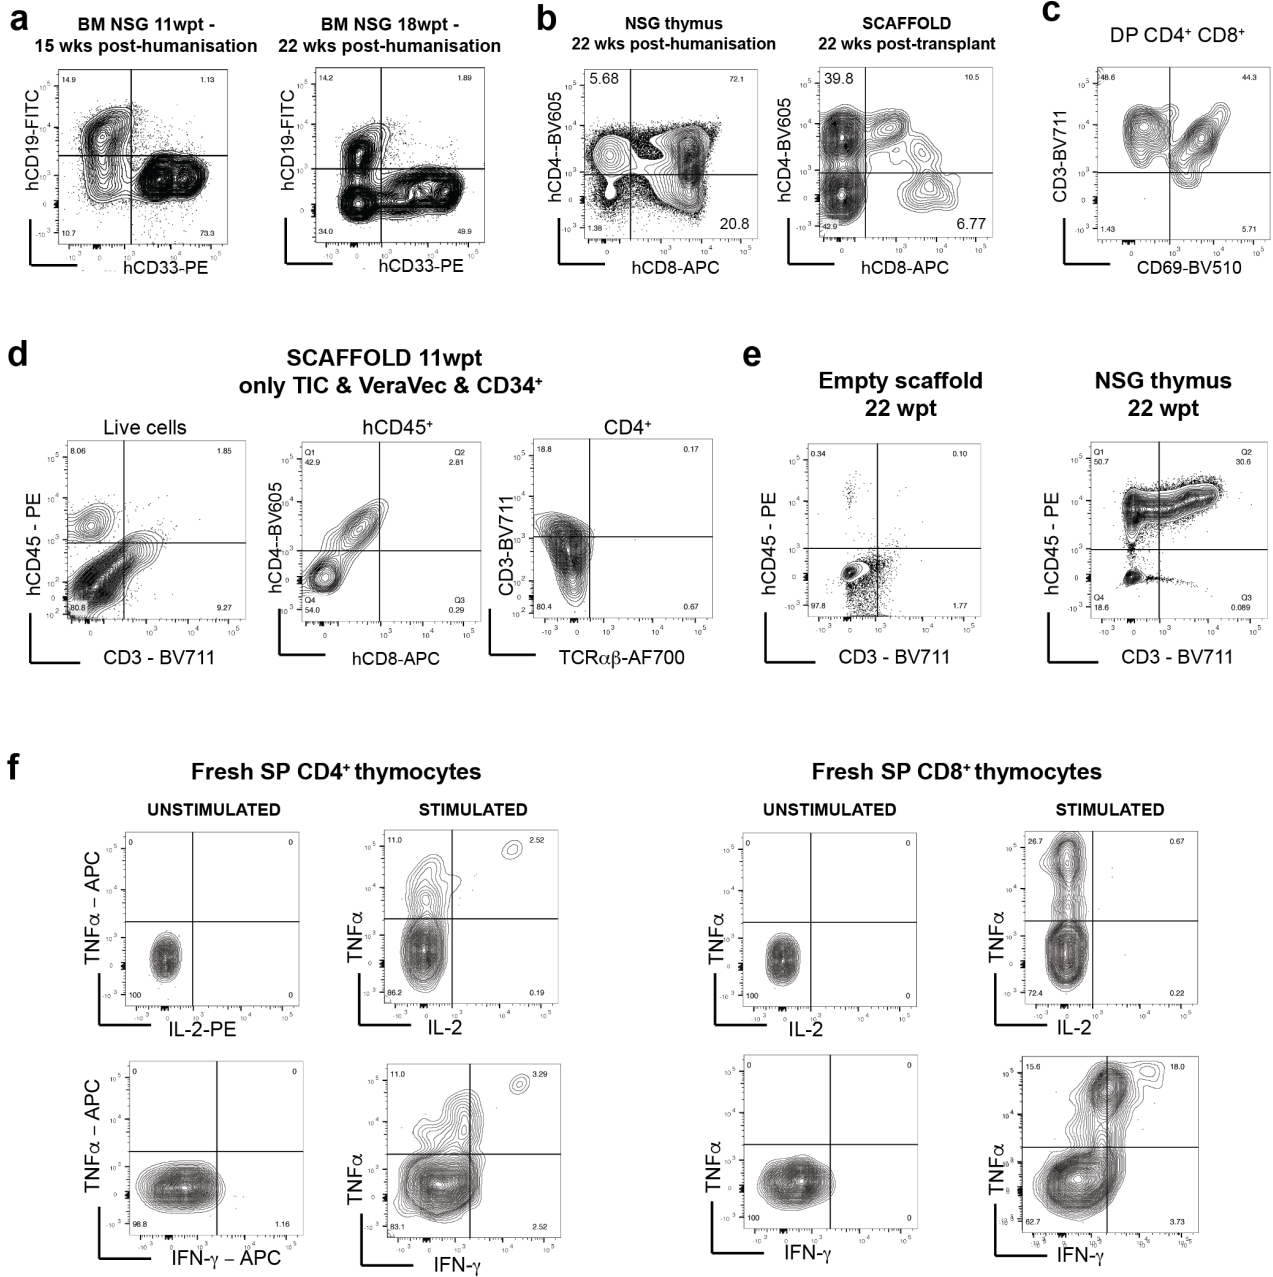

**Supplementary Fig. 8 | Thymus scaffolds support *in vivo* T cell development.** **a**, FACS analysis of bone marrow (BM) of a humanised NSG mice at 15 weeks post-humanisation (11 wpt) and 22 weeks post-humanisation (18 wpt) demonstrate CD34<sup>+</sup> HSC ability to differentiate towards myeloid (CD33<sup>+</sup>) and B cell (CD19<sup>+</sup>) lineage (n=16, live cells=50000). **b**, FACS analysis of hCD45<sup>+</sup> population recovered following dissociation to single cells of NSG mouse thymus 22 weeks after humanisation (left panel, live cells=300000) and of a repopulated thymus scaffold 22 wpt (right panel, live cells=5000): CD4/CD8 ratio is higher when the instructing stroma is of human origin (n=2). **c**, FACS analysis of repopulated scaffold at 11wpt showing CD69 expression by DP thymocytes (same scaffold as in Fig. 6g, live cells=1100; n=2). **d**, FACS analysis of *in vivo* repopulated scaffold with TIC, VeraVEC and CD34<sup>+</sup> HSC at 11 wpt (n=2, live cells= 4800), showing few CD3<sup>-</sup> hCD45<sup>+</sup> events (left panel), absence of mature T cells (mid and right panels). **e**, Absence of hCD3<sup>+</sup> cells among live cells in a transplanted empty scaffold (n=4) at 22wpt (left panel) compared to endogenous thymus of the same mouse (right panel). **f**, Representative FACS analysis of human SP CD4<sup>+</sup> and CD8<sup>+</sup> thymocytes freshly isolated from a paediatric thymus (2 years old) and stimulated with PMA-*Ionomycin* demonstrating that human SP thymocytes produce only limited amount or none of IL2. CD8 SP cells, produce the highest level of IFN $\gamma$  and TNF $\alpha$  similarly to what we observed in thymocytes developed within the human scaffolds (n=3, live cells=6500).

Supplementary Fig. 9

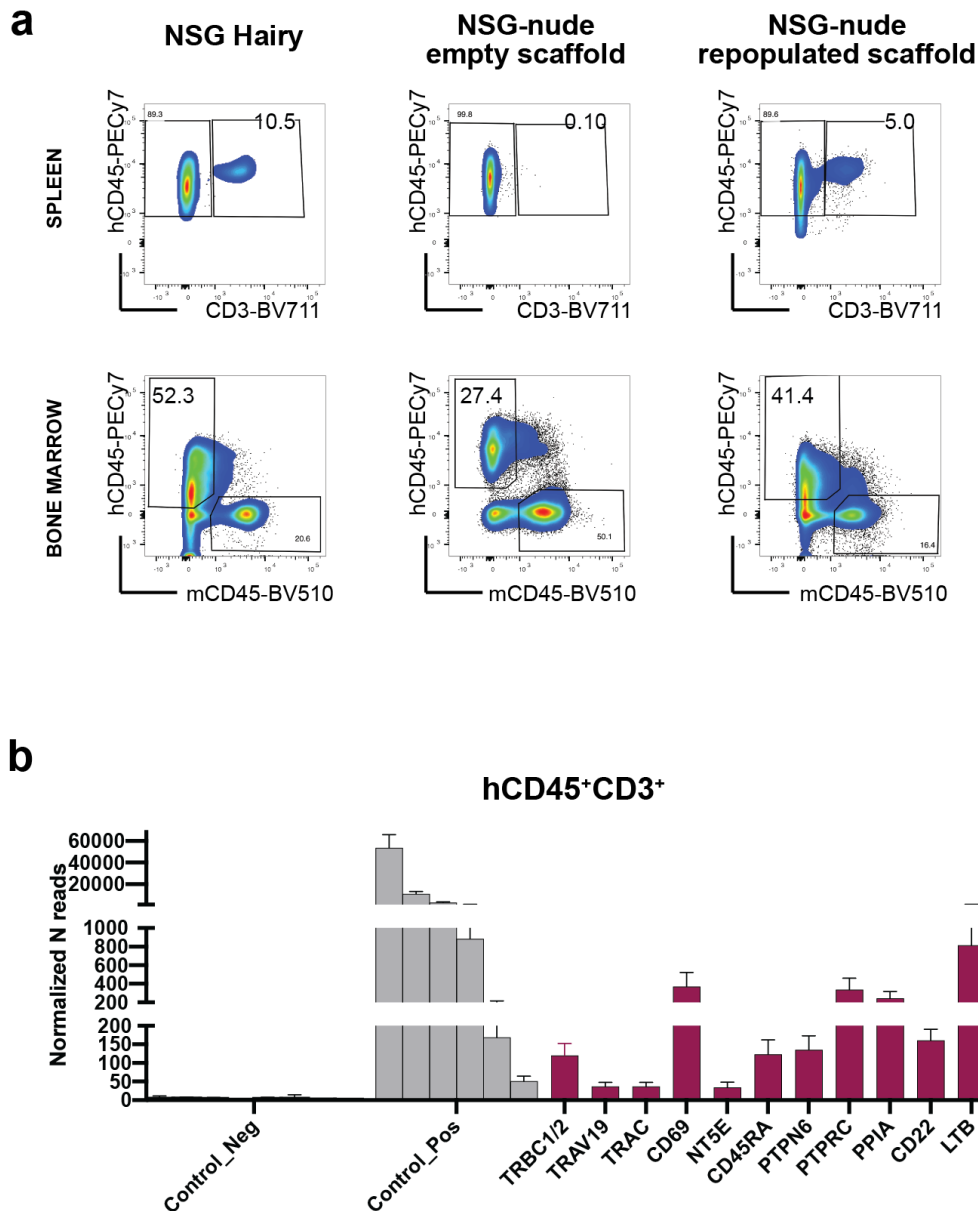

**Supplementary Fig. 9 | Peripheral repopulation by T cells in athymic NSG-nude mice.**  
**a.** FACS plots showing hCD45<sup>+</sup> population (gated on at least 20,000 live cells) of spleen and bone marrow of humanised NSG mouse (Hairy, left panel; n=5 mice), humanised NSG-nude mouse grafted with empty scaffolds (middle panel; n=2 mice) and humanised NSG-nude mouse grafted with repopulated scaffolds (right panel; n=2 mice). **b.** NanoString analysis was performed on hCD45<sup>+</sup>CD3<sup>+</sup> cells sorted from humanised NSG-nude spleen (n=2, 1869 and 8081 sorted events) using commercially available NanoString nCounter™ CAR-T Characterisation panel. Representative TCR signalling signature genes expressed by hCD45<sup>+</sup>CD3<sup>+</sup>, i.e. *TRB1/2*, *TRAV19*, *TRAC*, *CD69*, *NT5E*, *CD45R*, *PTPN6*, *PTPRC*, *PPIA*, *CD22* and *LTB*. Analysis of positive and negative control are included.



Supplementary Fig. 10

**a Gating strategy: TIC IN CULTURE corresponding to analysis of Figure 3e and Suppl 3a**

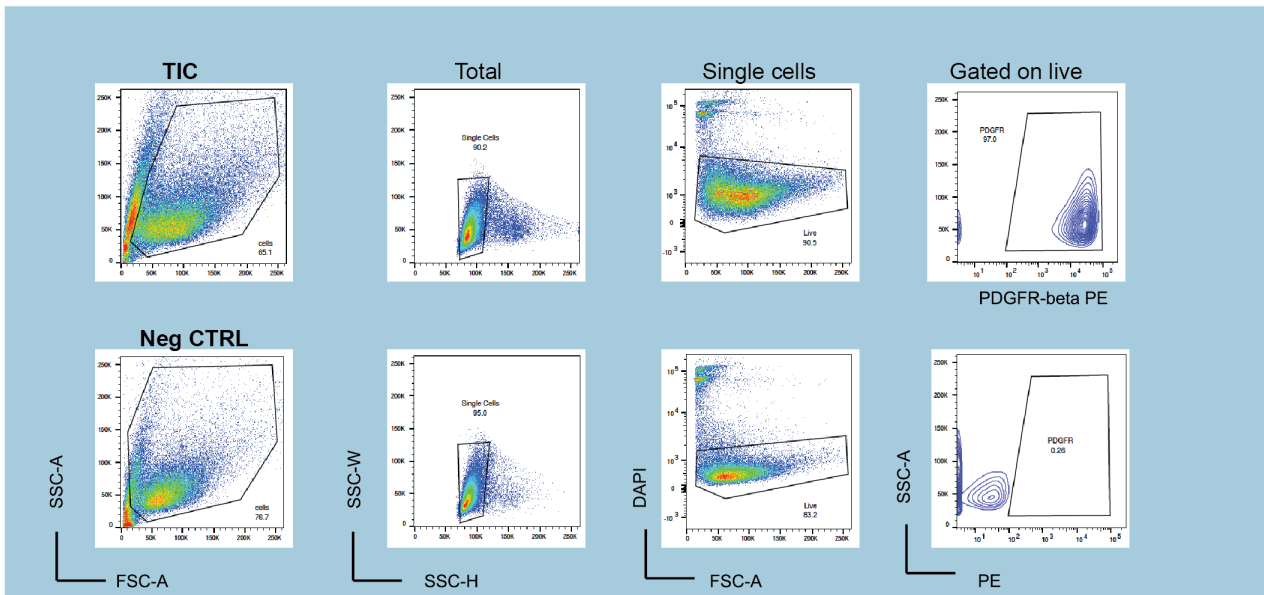

**b Gating strategy: TIC IN CULTURE corresponding to analysis of Suppl Figure 3b**

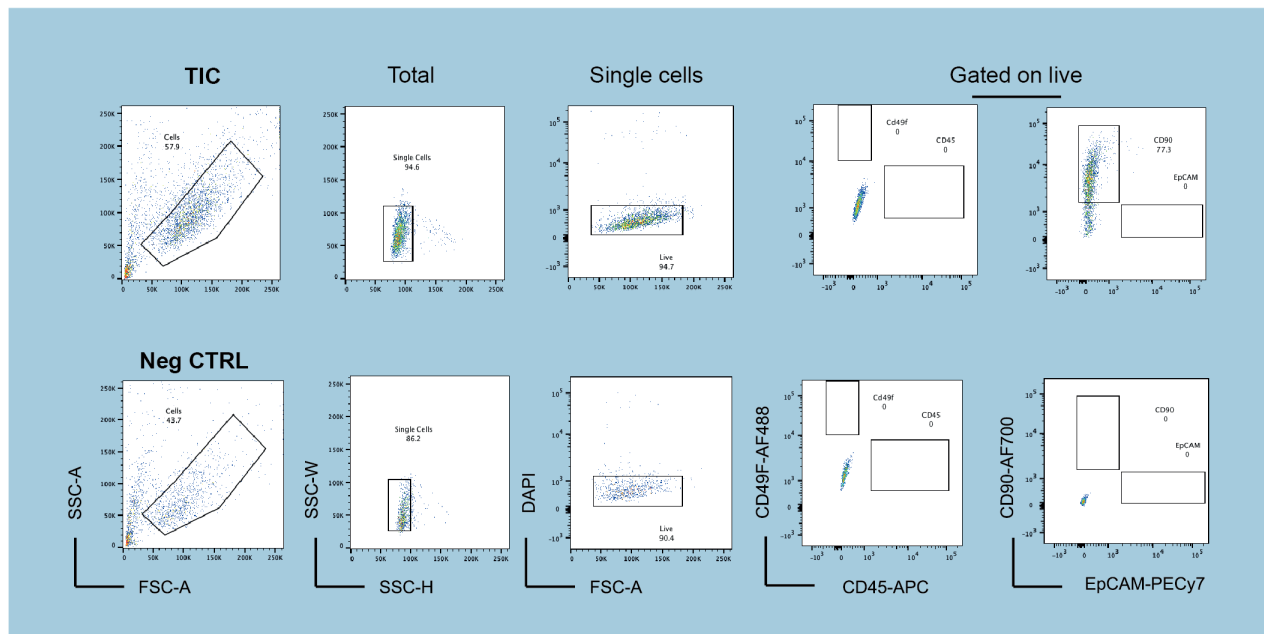

**C Gating strategy: TN purity check corresponding to Suppl Fig.7f top panel**

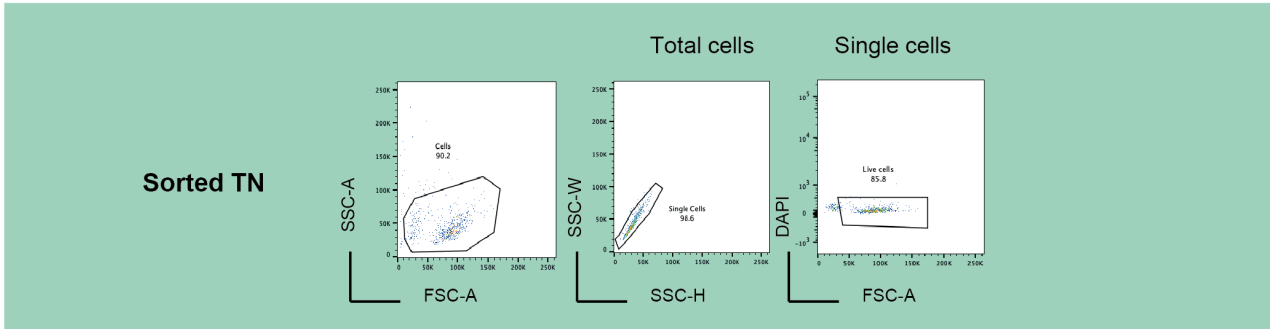

**d Gating strategy: Total thymocytes and TN corresponding to Suppl Fig. 7f bottom panel**

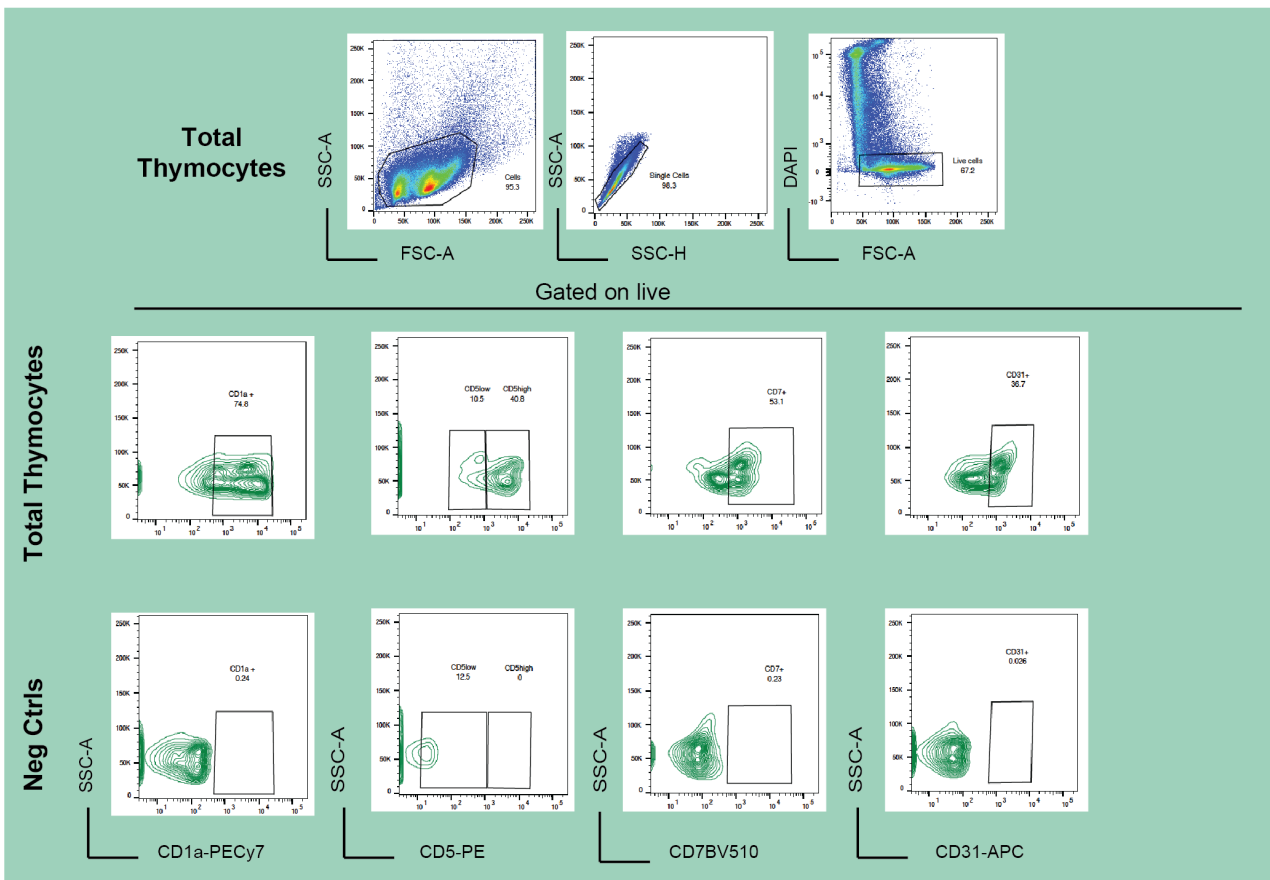

**e Gating strategy: In vivo scaffold analysis corresponding to Fig. 6f,g, Suppl Fig. 8b-e**

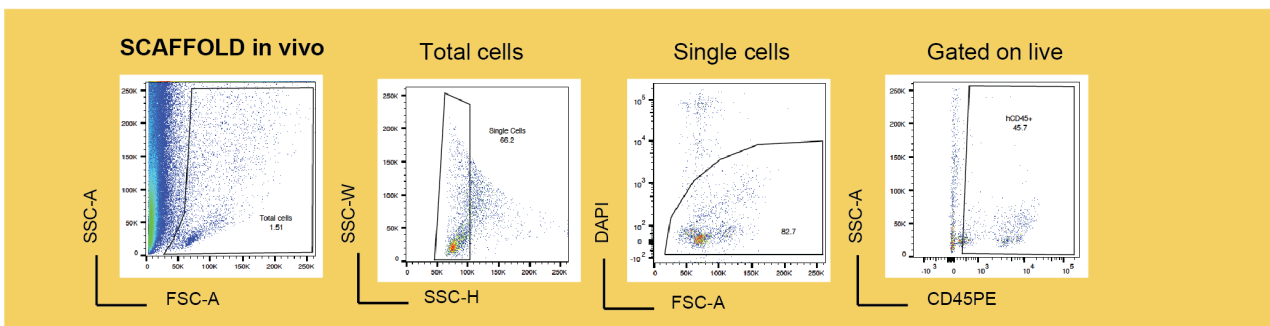

**f** Gating strategy: PMA-Ionomycin assay corresponding to analysis in Fig.6h and Suppl Fig.8f

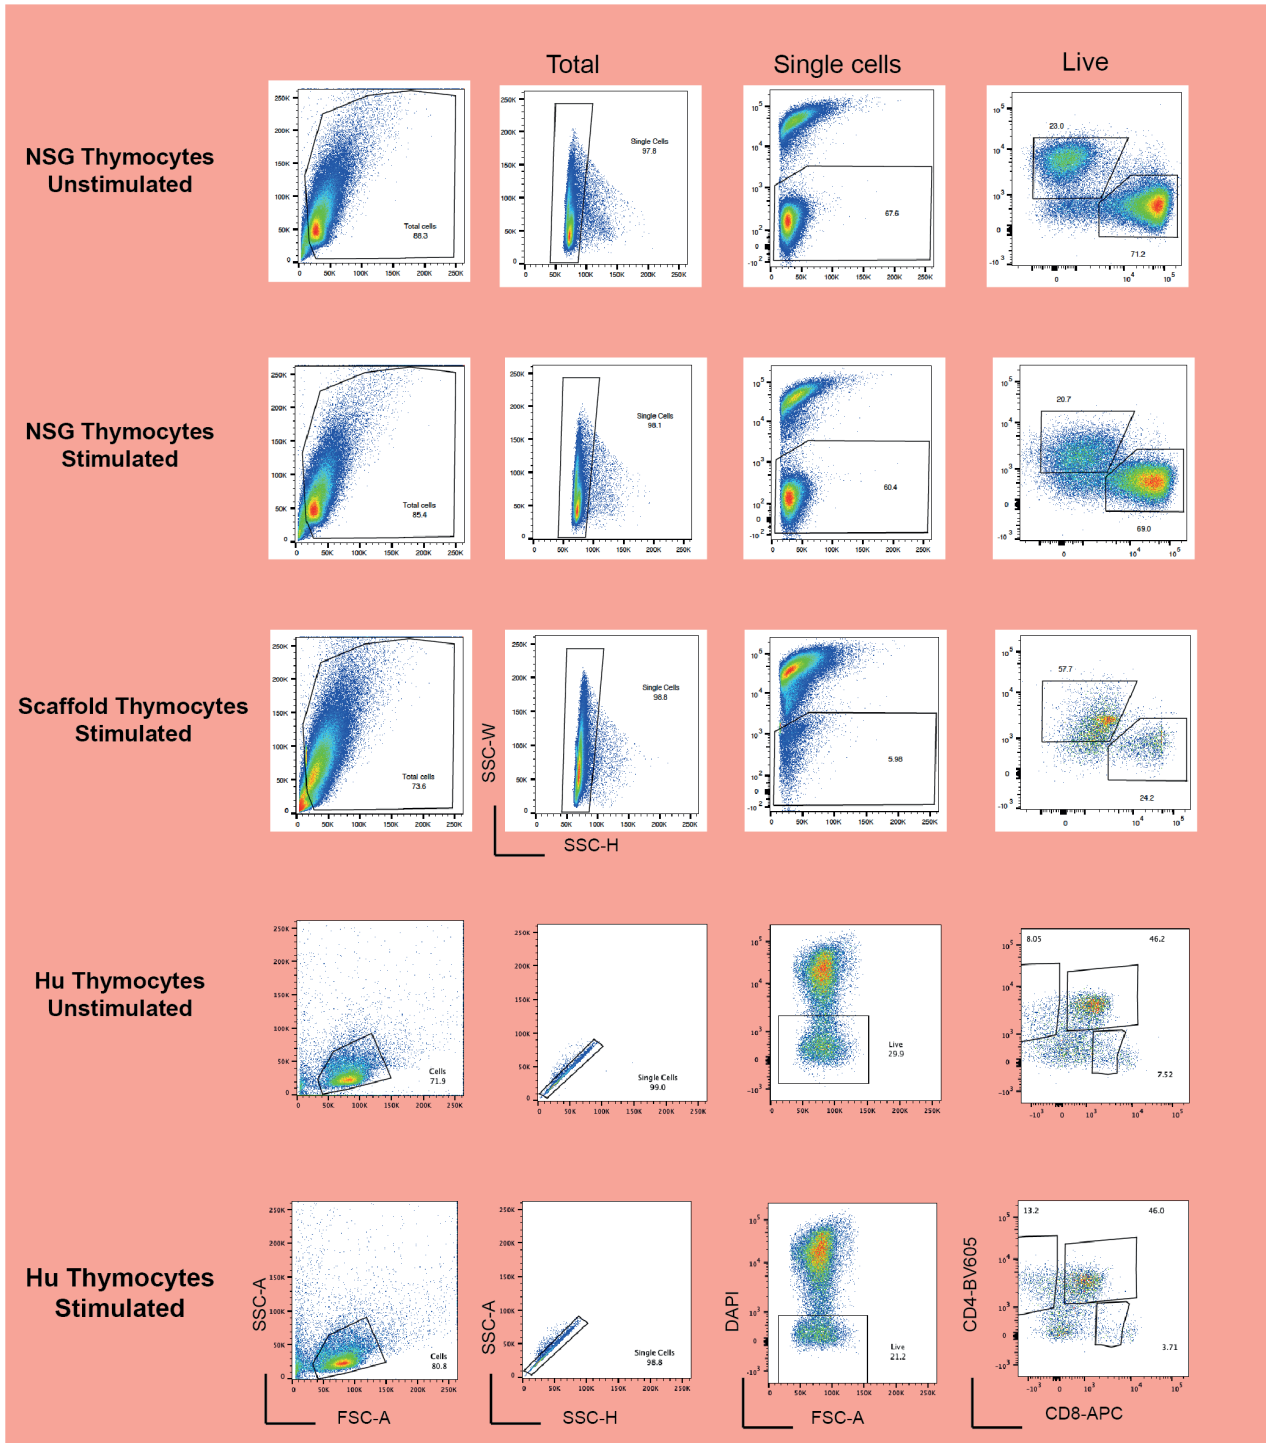

**g** Gating strategy: purity of CB-HSC corresponding to Suppl Fig. 7a

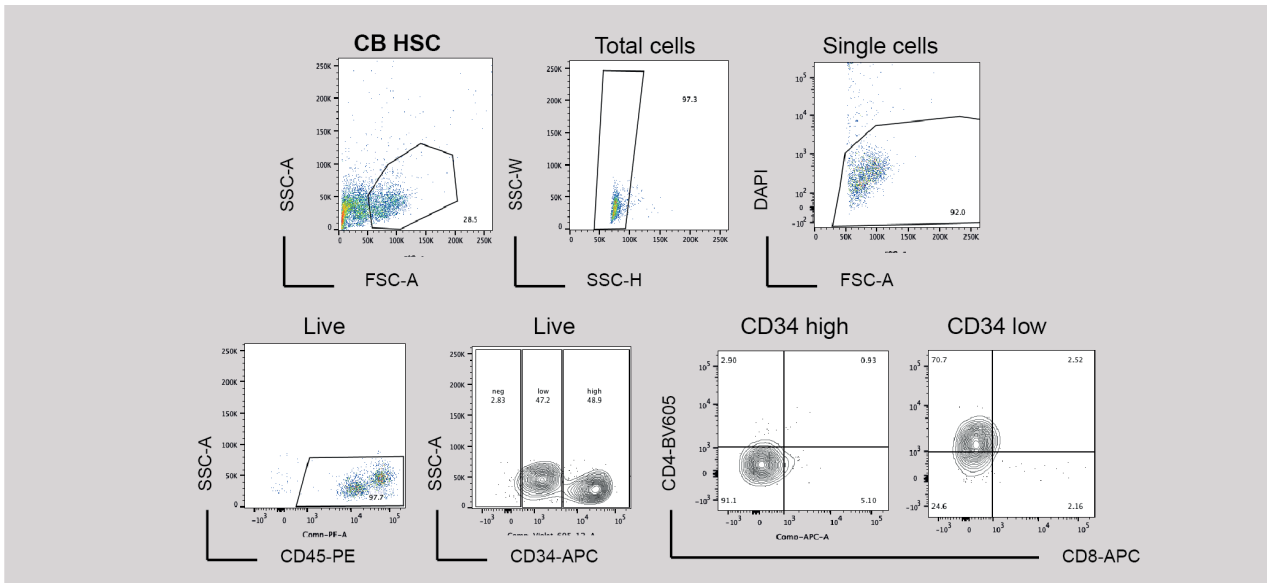

**h** Gating strategy: Nude mice humanisation and periphery analysis corresponding to Suppl Fig. 9

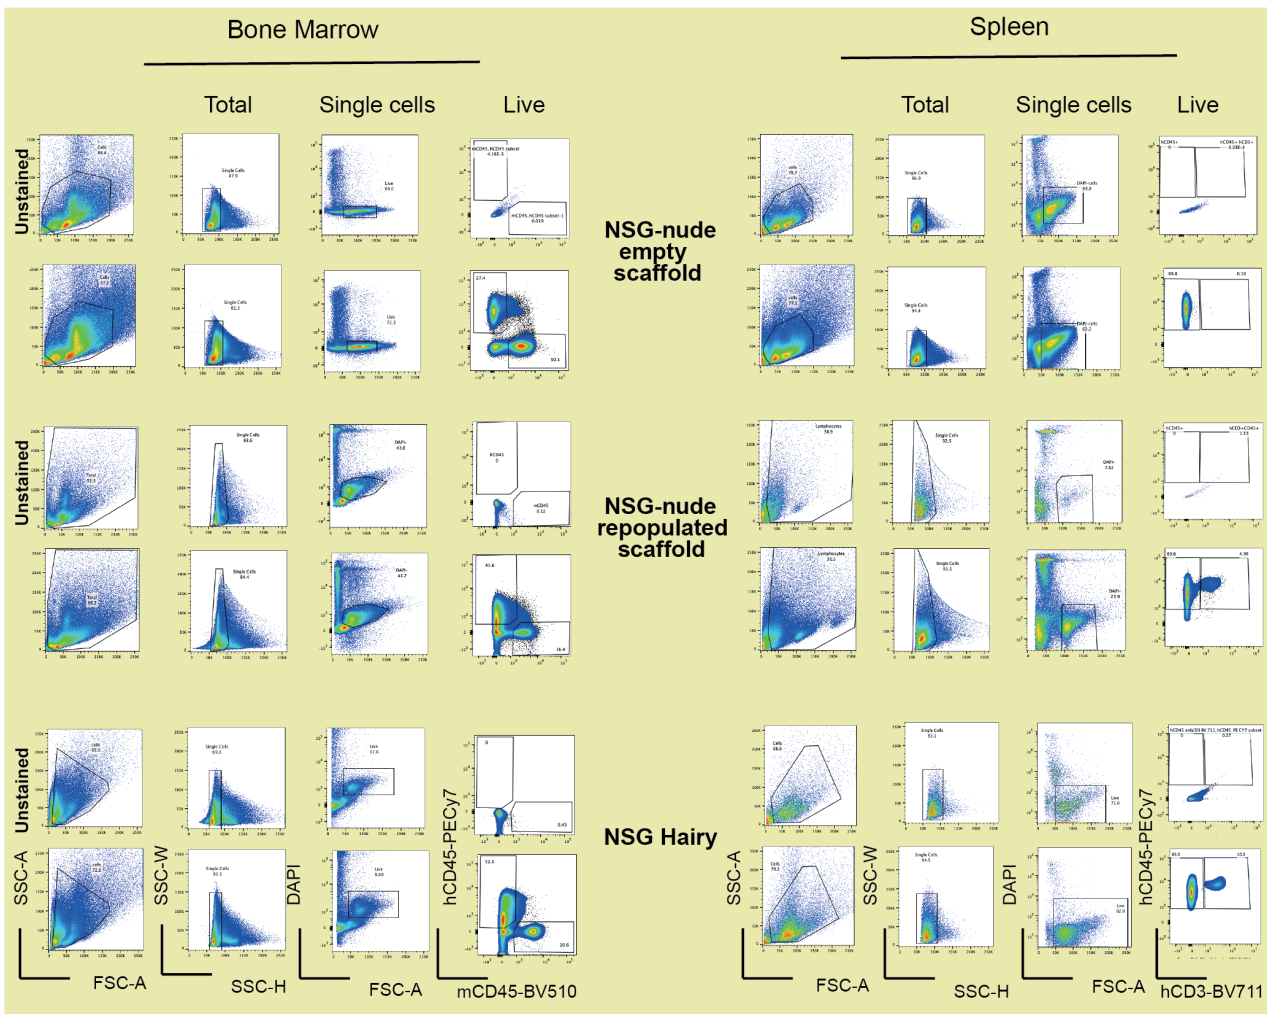

## Supplementary Figure 10 | Gating strategies of flow cytometry analyses.

**a,b** Gating strategy used to examine by flow cytometry molecular markers expressed by human thymic interstitial cells. TIC have been gated sequentially for single-cells, live cells and markers expression. Unstained negative control is shown in the bottom panels. **a.** This gating strategy was used to examine relevant parameters in Figure 3e and quantify marker expression in Supplementary Figure 3a. **b.** This gating strategy was used to verify the absence of hCD45 and epithelial markers in TIC in Supplementary Figure 3b.

**c.** Gating strategy used to determine purity check of sorted triple negative thymocytes: total, single and live cells gates are displayed. Cells were ~85% viable after sorting. **d.** Gating strategies used to examine T cell markers in human triple negative (TN) and total thymocytes: total, single and live cells gates are displayed (top panel), total thymocytes (middle panel) and corresponding negative control (unstained, bottom panel). This gating strategy is relative to Supplementary Figure 7f, bottom panels.

**e.** Gating strategy used to examine thymocytes development within repopulated scaffolds transplanted subcutaneously in NSG mice and harvested at different time points. FACS panels display sequential gates for single cells, live cells and hCD45<sup>+</sup> gated on live cells. This gating strategy is relative to Figure 6f,g and Supplementary Figure 8b-e.

**f.** Gating strategy used to examine cytokine production of thymocytes after stimulation with PMA-*Ionomyacin*. Sequential gates for single-cells, live cells and CD4 vs CD8 is displayed from the top to the bottom for NSG thymocytes unstimulated, stimulated, scaffold thymocytes stimulated, human thymocytes unstimulated and stimulated, respectively. This gating strategy is relative to Figure 6h and Supplementary Figure 8f.

**g.** Gating strategy used to determine purity check of human CB HSC used to humanise NSG and NSG-nude mice. Top panel displays sequential gates for single cells and live cells. Bottom panel shows CD45 (left plot), CD34 (middle plot) expression and CD4 & CD8 expression by high and low CD34<sup>+</sup> cell population (right plots). This gating strategy is relative to Supplementary Figure 7a FACS analysis.

**h.** Gating strategy used to analyse bone marrow reconstitution and spleen of NSG-nude mice. Sequential gates for single-cells, live cells and human vs mouse CD45 are displayed for NSG-nude empty scaffold, repopulated scaffolds and NSG Hairy mouse along with its unstained counterpart (left panels). Sequential gates for single-cells, live cells and human CD45 and CD3 are displayed for NSG Nude empty scaffold, repopulated scaffolds and NSG hairy mouse along with its unstained counterpart (right panels). This gating strategy is relative to Supplementary Figure 9a.

**Supplementary Table 1 | List of antibodies used for flow cytometry**

| Antigen              | Fluorochrome | Dilution | Clone     | Reactivity  | Company     | Catalog |
|----------------------|--------------|----------|-----------|-------------|-------------|---------|
| Alkaline Phosphatase | AF647        | 1:100    | B4-78     | Human       | BD          | 561500  |
| CD11c                | FITC         | 1:100    | 3.9       | Human       | BioLegend   | 301604  |
| CD104                | PE           | 1:100    | 58XB4     | Human       | BioLegend   | 327807  |
| CD146                | BV711        | 1:100    | P1H12     | Human       | BD          | 563186  |
| CD19                 | FITC         | 1:100    | HIB19     | Human       | BioLegend   | 302206  |
| CD1a                 | PE-Cy7       | 1:200    | HI149     | Human       | BioLegend   | 300122  |
| CD205                | PE           | 1:400    | HD30      | Human       | BioLegend   | 342203  |
| CD235ab              | Biotin       | 1:100    | HIR2      | Human       | BioLegend   | 306618  |
| CD3                  | Biotin       | 1:200    | UCHT1     | Human       | BioLegend   | 300404  |
| CD3                  | BV711        | 1:200    | UCHT1     | Human       | BioLegend   | 300464  |
| CD31                 | APC          | 1:100    | WM59      | human       | BioLegend   | 303115  |
| CD33                 | PE           | 1:25     | WM53      | Human       | BD          | 555450  |
| CD33                 | FITC         | 1:100    | P67.6     | Human       | BioLegend   | 366619  |
| CD34                 | BV605        | 1:100    | 581       | Human       | BioLegend   | 343530  |
| CD34                 | APC          | 1:100    | 561       | Human       | BioLegend   | 343608  |
| CD4                  | FITC         | 1:100    | OKT4      | Human       | TONBO       | 35-0048 |
| CD4                  | Biotin       | 1:100    | SK3       | Human       | BioLegend   | 344610  |
| CD4                  | BV605        | 1:100    | OKT4      | Human       | BioLegend   | 317438  |
| CD45                 | Biotin       | 1:100    | a30-F11   | Mouse       | BioLegend   | 103104  |
| CD45                 | PE           | 1:200    | HI30      | Human       | BioLegend   | 304008  |
| CD45                 | AF700        | 1:200    | HI30      | Human       | BioLegend   | 304024  |
| CD45                 | APC          | 1:200    | HI30      | Human       | BioLegend   | 304011  |
| CD45                 | Biotin       | 1:100    | HI30      | Human       | BioLegend   | 304004  |
| CD45                 | PE-Cy7       | 1:200    | HI30      | Human       | BioLegend   | 304015  |
| CD49f                | AF488        | 1:200    | GoH3      | Human/Mouse | BioLegend   | 313608  |
| CD5                  | PE           | 1:200    | UCHT2     | Human       | BioLegend   | 300608  |
| CD56 (NCAM)          | FITC         | 1:100    | HCD56     | Human       | BioLegend   | 318304  |
| CD69                 | BV510        | 1:100    | FN50      | Human       | BioLegend   | 310936  |
| CD7                  | BV510        | 1:100    | M-T701    | Human       | BD          | 563650  |
| CD8a                 | APC          | 1:200    | SK1       | Human       | TONBO       | 20-0087 |
| CD8a                 | Biotin       | 1:200    | RPA-T     | Human       | BioLegend   | 301004  |
| CD8b                 | PE-Cy7       | 1:200    | SIDI8BEE  | Human       | eBioscience | 25-5273 |
| CD90                 | AF700        | 1:200    | 5E10      | Human       | BioLegend   | 328119  |
| EpCAM (CD326)        | eFluor660    | 1:50     | 1B7       | Human       | eBioscience | 50-9326 |
| EpCAM (CD326)        | PE-Cy7       | 1:100    | 9C4       | Human       | BioLegend   | 324222  |
| IFN-g                | PE-Cy7       | 1:50     | 4S.B3     | Human       | BioLegend   | 502527  |
| IL-2                 | PE           | 1:50     | MQ1-17H12 | Human       | BioLegend   | 500306  |
| NG2                  | AF488        | 1:200    | 9.2.27    | Human       | BD          | 562413  |
| PDGFRa (CD140a)      | PE           | 1:50     | 16A1      | Human       | BioLegend   | 323506  |
| PDGFRb (CD140b)      | PE           | 1:100    | 18A2      | Human       | BioLegend   | 323606  |
| Streptavidin         | BV510        | 1:100    | IP26      | Human       | BioLegend   | 405233  |
| TCR-ab               | AF700        | 1:100    | IP26      | Human       | BioLegend   | 306730  |
| TNF-a                | APC          | 1:100    | MAb11     | Human       | BioLegend   | 502812  |
| HLA-DR               | BV711        | 1:100    | L243      | human       | BioLegend   | 307644  |

**Supplementary Table 2 | List of Taqman qPCR probes (Integrated DNA Technologies)**

| <b>Gene Name</b>    | <b>RefSeq Number</b> | <b>IDT Assay Name</b> |
|---------------------|----------------------|-----------------------|
| <i>AIRE</i>         | NM_000383            | Hs.PT.56a.2617893     |
| <i>CCL21</i>        | NM_002989            | Hs.PT.58.26537771.g   |
| <i>CCL25</i>        | NM_005624            | Hs.PT.58.1144750      |
| <i>CD205 (LY75)</i> | NM_002349            | Hs.PT.58.3240196      |
| <i>EPCAM</i>        | NM_002354            | Hs.PT.58.39570895     |
| <i>FOXP1</i>        | NM_003593            | Hs.PT.58.40389553     |
| <i>KITLG/SCF</i>    | NM_003994            | Hs.PT.58.38688683     |
| <i>PAX1</i>         | NM_006192            | Hs.PT.58.3033944      |
| <i>PAX9</i>         | NM_006194            | Hs.PT.58.25853242     |
| <i>PSMB11/ b5T</i>  | NM_001099780         | Hs.PT.58.40855890.g   |
| <i>TRP63</i>        | NM_001114981         | Hs.PT.58.2966111      |
| <i>VIM</i>          | NM_003380            | Hs.PT.58.38906895     |

**Supplementary Table 3 | List of primary and secondary antibodies for immunostaining**

| <b>Antigen</b>             | <b>Host</b> | <b>Dilution</b> | <b>Company</b>        | <b>Cat.No.</b> |
|----------------------------|-------------|-----------------|-----------------------|----------------|
| Aire                       | Rat         | 1:250           | ThermoSci/ Invitrogen | 14-9534-82     |
| Caspase3                   | Rabbit      | 1:300           | CellSignaling         | 9661           |
| CD3-APC conjugated         | Mouse       | 1:100           | Biolegend             | 20-0038        |
| CD3                        | Rabbit      | 1:100           | Abcam                 | AB16669        |
| CD11c-FITC conjugated      | Mouse       | 1:100           | Biolegend             | 301604         |
| CD45-APC conjugated        | Mouse       | 1:100           | Biolegend             | 304011         |
| CD45                       | Rabbit      | 1:100           | Abcam                 | AB10558        |
| CD49f- AF488 conjugated    | Rat         | 1:100           | Biolegend             | 313608         |
| CD205-AF647 conjugated     | Mouse       | 1:100           | Biolegend             | 342206         |
| CK5                        | Mouse       | 1:100           | Abcam                 | AB17130        |
| CK5/14                     | Rabbit      | 1:500           | BioLegend             | PRB-155P       |
| CK8                        | Mouse       | 1:50            | Abcam                 | AB9023         |
| CK8                        | Guinea pig  | 1:100           | Acris/2BeScientific   | BP5075         |
| CK8/18                     | Guinea pig  | 1:100           | Acris/2BeScientific   | BP5075         |
| E-Cadherin                 | Rabbit      | 1:500           | Abcam                 | AB40772        |
| E-Cadherin                 | Mouse       | 1:100           | BD                    | 610181         |
| Endomucin                  | Rat         | 1:100           | SantaCruz             | SC-65495       |
| EpCAM                      | Rabbit      | 1:100           | Sigma Aldrich         | HPA026761      |
| EpCAM- efluor660 conjugate | Mouse       | 1:100           | eBioscience           | 50-9326-42     |
| HLA-DR                     | Rabbit      | 1:200           | Abcam                 | AB92511        |
| Ki67                       | Rabbit      | 1:300           | Chemicon              | AB9260         |
| p63                        | Mouse       | 1:50            | Abcam                 | AB735          |
| TE-7                       | Mouse       | 1:100           | Merk                  | CBL271         |
| Vimentin                   | Mouse       | 1:100           | SantaCruz             | SC-6260        |
| Vimentin                   | Rabbit      | 1:100           | CellSignaling         | 5741           |

| <b>Secondary Antibodies</b> | <b>Host</b> | <b>Dilution</b> | <b>Company</b> | <b>Cat.No.</b> |
|-----------------------------|-------------|-----------------|----------------|----------------|
| Anti-GP Cy3                 | Donkey      | 1:500           | Jackson Immuno | 706-165-148    |
| Anti-Mouse AF488            | Donkey      | 1:500           | Jackson Immuno | 715-545-150    |
| Anti-Mouse Cy3              | Donkey      | 1:500           | Jackson Immuno | 715-165-150    |
| Anti-Mouse AF647            | Donkey      | 1:500           | Jackson Immuno | 715-605-150    |
| Anti-Rabbit AF488           | Donkey      | 1:500           | Jackson Immuno | 711-545-152    |
| Anti-Rabbit AF594           | Donkey      | 1:500           | Jackson Immuno | 711-585-152    |
| Anti-Rabbit AF647           | Donkey      | 1:500           | Jackson Immuno | 711-605-152    |
| Anti-Rat AF488              | Donkey      | 1:500           | Jackson Immuno | 712-545-150    |
| Anti-Rat AF 647             | Donkey      | 1:500           | Jackson Immuno | 712-605-150    |
