# Supplementary material for: Reconstitution of a functional human thymus by postnatal stromal progenitor cells and natural whole-organ scaffolds
Source: PubMed Central journal article supplement (PMC7732825; doi:10.1038/s41467-020-20082-7), 2020-12-11
Supplement: 41467_2020_20082_MOESM2_ESM.pdf [file 41467_2020_20082_MOESM2_ESM.pdf]

## **Description of Additional Supplementary Files**

**Supplementary Movie 1:** Time-lapse recording of a growing clonal colony demonstrates high mobility of thymic epithelial cells (TEC). Images were acquired over a period of 4 days.

**Supplementary Movie 2:** 3D video rendering of a cannulated rat thymus generated from micro-CT data. A superior-inferior clipping plane has been applied to the data, this demonstrates differentiation of cortex and medullary structures following administration of I<sub>2</sub>KI contrast prior to the scan. Video prepared using VG Studio MAX (Heidelberg, Germany).
